# Supplementary material for: Bioengineered Ag/AgCl nanoparticles from Kocuria kristinae: sustainable synthesis with potent antibacterial, hepatotoxic, and enzyme-modulating activities
Source: Royal Society of Chemistry journal article supplement (doi:10.1039/d5na01052g), 2026-04-09
Supplement: d5na01052g1.pdf [file d5na01052g1.pdf]

***Bioengineered Ag/AgCl Nanoparticles from Kocuria kristinae: Sustainable Synthesis with Potent Antibacterial, Hepatotoxic, and Enzyme-Modulating Activities***

**Lana Mohammed <sup>a</sup>, Mohsin A. Salih <sup>b</sup>, Zana H. Ibrahim<sup>c</sup>, Payam B. Hassan<sup>d</sup>, Sameera Sh. Mohammad Ameen <sup>e</sup>, Khalid M. Omer<sup>f\*</sup>, Zhinya Y. Majeed <sup>a</sup>, Dalya M. Hamad <sup>a</sup>, Shnyar O. Ahmed <sup>a</sup>, Rayan F. Hassan <sup>a</sup>, Hevy N. Hussein <sup>a</sup>**

<sup>a</sup> Department of Medical Laboratory, College of Health and Medical Technology, Sulaimani Polytechnic University, Sulaymaniyah, Kurdistan region, Iraq.

<sup>b</sup> Department of Nursing, College of Health and Medical Technology, Sulaimani Polytechnic University, Sulaymaniyah, Kurdistan region Iraq.

<sup>c</sup> Department of Medical Laboratory Science, College of Science, University of Raparin, Ranya, Sulaimaniyah, Iraq.

<sup>d</sup> Department of Biology, College of Science, University of Sulaimani, Qliasan St. 46002, Sulaymaniyah, Kurdistan region, Iraq.

<sup>e</sup> Department of Chemistry, College of Science, University of Zakho, 42002, Zakho, Kurdistan region, Iraq

<sup>f</sup> Department of Chemistry, College of Science, University of Sulaimani, Qliasan St. 46002, Sulaymaniyah, Kurdistan region, Iraq

\* To corresponding should be addressed: [Khalid.omer@univsul.edu.iq](mailto:Khalid.omer@univsul.edu.iq)

|                                             |      |                                  |                          |       |   |    |       |   |    |      |   |    |       |   |    |       |     |
|---------------------------------------------|------|----------------------------------|--------------------------|-------|---|----|-------|---|----|------|---|----|-------|---|----|-------|-----|
| Patient Name:                               |      | Patient ID:                      |                          |       |   |    |       |   |    |      |   |    |       |   |    |       |     |
| Location:                                   |      | Physician:                       |                          |       |   |    |       |   |    |      |   |    |       |   |    |       |     |
| Lab ID: S07/B6                              |      | Isolate Number: 1                |                          |       |   |    |       |   |    |      |   |    |       |   |    |       |     |
| Organism Quantity:                          |      | Collected:                       |                          |       |   |    |       |   |    |      |   |    |       |   |    |       |     |
| Selected Organism: <b>Kocuria kristinae</b> |      |                                  |                          |       |   |    |       |   |    |      |   |    |       |   |    |       |     |
| Source:                                     |      |                                  |                          |       |   |    |       |   |    |      |   |    |       |   |    |       |     |
| Comments:                                   |      |                                  |                          |       |   |    |       |   |    |      |   |    |       |   |    |       |     |
|                                             |      |                                  |                          |       |   |    |       |   |    |      |   |    |       |   |    |       |     |
|                                             |      |                                  |                          |       |   |    |       |   |    |      |   |    |       |   |    |       |     |
| <b>Identification Information</b>           |      | <b>Analysis Time:</b> 4.80 hours | <b>Status:</b> Final     |       |   |    |       |   |    |      |   |    |       |   |    |       |     |
| <b>Selected Organism</b>                    |      | 99% Probability                  | <b>Kocuria kristinae</b> |       |   |    |       |   |    |      |   |    |       |   |    |       |     |
| <b>ID Analysis Messages</b>                 |      | <b>Bionumber:</b>                | 010030300000030          |       |   |    |       |   |    |      |   |    |       |   |    |       |     |
| <b>Biochemical Details</b>                  |      |                                  |                          |       |   |    |       |   |    |      |   |    |       |   |    |       |     |
| 2                                           | AMY  | -                                | 4                        | PIPLC | - | 5  | dXYL  | - | 8  | ADH1 | + | 9  | BGAL  | - | 11 | AGLU  | (-) |
| 13                                          | APPA | -                                | 14                       | CDEX  | - | 15 | AspA  | - | 16 | BGAR | - | 17 | AMAN  | - | 19 | PHOS  | -   |
| 20                                          | LeuA | +                                | 23                       | ProA  | + | 24 | BGURr | - | 25 | AGAL | - | 26 | PyrA  | - | 27 | BGUR  | -   |
| 28                                          | AlaA | +                                | 29                       | TyrA  | + | 30 | dSOR  | - | 31 | URE  | - | 32 | POLYB | - | 37 | dGAL  | -   |
| 38                                          | dRIB | -                                | 39                       | ILATk | - | 42 | LAC   | - | 44 | NAG  | - | 45 | dMAL  | - | 46 | BACI  | -   |
| 47                                          | NOVO | -                                | 50                       | NC6.5 | - | 52 | dMAN  | - | 53 | dMNE | - | 54 | MBdG  | - | 56 | PUL   | -   |
| 57                                          | dRAF | -                                | 58                       | O129R | - | 59 | SAL   | - | 60 | SAC  | + | 62 | dTRE  | + | 63 | ADH2s | -   |
| 64                                          | OPTO | -                                |                          |       |   |    |       |   |    |      |   |    |       |   |    |       |     |

**Figure S1.** Identification of *Kocuria kristinae* using Vitek 2 automated system

|                                         |                                                                                                                                         |                                                                                                   |                        |                   |               |            |                        |
|-----------------------------------------|-----------------------------------------------------------------------------------------------------------------------------------------|---------------------------------------------------------------------------------------------------|------------------------|-------------------|---------------|------------|------------------------|
| <b>Patient Name</b>                     | <b>Referred By:</b> OP                                                                                                                  | <br>SML1056137 |                        |                   |               |            |                        |
| <b>Age:</b>                             | <b>Sample Code:</b> 796299                                                                                                              |                                                                                                   |                        |                   |               |            |                        |
| <b>Data Record:</b> 10/12/2023 10:08 AM | <b>Printout:</b> 13/12/2023 03:03 PM                                                                                                    |                                                                                                   |                        |                   |               |            |                        |
| <b>Microbiology</b>                     |                                                                                                                                         |                                                                                                   |                        |                   |               |            |                        |
| <b>Culture &amp; Sensitivity</b>        |                                                                                                                                         |                                                                                                   |                        |                   |               |            |                        |
| <b>Test Name</b>                        | <b>Result</b>                                                                                                                           |                                                                                                   |                        |                   |               |            |                        |
| Sample type                             |                                                                                                                                         |                                                                                                   |                        |                   |               |            |                        |
| Result (Isolated microorganism)         | Staphylococcus aureus                                                                                                                   |                                                                                                   |                        |                   |               |            |                        |
| <b>Antibiotic</b>                       | <b>Result</b>                                                                                                                           | <b>MIC</b>                                                                                        | <b>Inhibition Zone</b> | <b>Antibiotic</b> | <b>Result</b> | <b>MIC</b> | <b>Inhibition Zone</b> |
| Gentamicin                              | Sensitive                                                                                                                               |                                                                                                   | 18                     | Fusidic acid      | Sensitive     |            | 26                     |
| Ceftriaxone                             | Sensitive                                                                                                                               |                                                                                                   | 24                     | Clindamycin       | Resistance    |            | 0                      |
| Minocycline                             | Sensitive                                                                                                                               |                                                                                                   | 21                     | Oxacillin         | Sensitive     |            | 18                     |
| Trimethoprim-Sulfamethoxazole           | Resistance                                                                                                                              |                                                                                                   | 0                      | Rifampin          | Sensitive     |            | 26                     |
| Ciprofloxacin                           | Resistance                                                                                                                              |                                                                                                   | 13                     | Doxycycline       | Resistance    |            | 10                     |
| Cefoxitin                               | Sensitive                                                                                                                               |                                                                                                   | 28                     | chloramphenicol   | Resistance    |            | 12                     |
| Levofloxacin                            | Resistance                                                                                                                              |                                                                                                   | 14                     | Vancomycin        | Resistance    |            | 14                     |
| Tigecycline                             | Sensitive                                                                                                                               |                                                                                                   | 18                     | Azithromycin      | Resistance    |            | 12                     |
| Linezolid                               | Sensitive                                                                                                                               |                                                                                                   | 24                     | Ofloxacin         | Resistance    |            | 8                      |
| Clarithromycin                          | Resistance                                                                                                                              |                                                                                                   | 0                      | Erythromycin      | Resistance    |            | 0                      |
| Tetracycline                            | Resistance                                                                                                                              |                                                                                                   | 0                      | Moxifloxacin      | Resistance    |            | 14                     |
| <b>Comment (Culture):</b>               | Sensitive antibiotics : Gentamicin, Ceftriaxone, Minocycline, Cefoxitin , Tigecycline, Linezolid, Fusidic acid , Oxacillin , Rifampin . |                                                                                                   |                        |                   |               |            |                        |

**Figure S2.** Identification and antibiotic sensitivity pattern of *Staphylococcus aureus* using Vitek 2 automated system.

|                                                   |                                                                              |                       |                               |            |                            |
|---------------------------------------------------|------------------------------------------------------------------------------|-----------------------|-------------------------------|------------|----------------------------|
| <b>Identification Information</b>                 | Card: GN                                                                     |                       | Status: Final                 |            |                            |
| <b>Selected Organism</b>                          | 99% Probability <i>Pseudomonas aeruginosa</i><br>Bionumber: 0003453103500252 |                       |                               |            |                            |
| <b>Susceptibility Information</b>                 | Card: AST-N326                                                               |                       | Status: Final                 |            | Analysis Time: 10.39 hours |
| <b>Antimicrobial</b>                              | <b>MIC</b>                                                                   | <b>Interpretation</b> | <b>Antimicrobial</b>          | <b>MIC</b> | <b>Interpretation</b>      |
| Piperacillin                                      | ≥ 128                                                                        | R                     | Netilmicin                    | ≥ 32       | R                          |
| Piperacillin/Tazobactam                           | ≥ 128                                                                        | R                     | Tobramycin                    | ≥ 16       | R                          |
| Ceftazidime                                       | ≥ 64                                                                         | R                     | Ciprofloxacin                 | ≥ 4        | R                          |
| Cefepime                                          | ≥ 32                                                                         | R                     | Levofloxacin                  | ≥ 8        | R                          |
| Aztreonam                                         |                                                                              |                       | Tetracycline                  |            |                            |
| Imipenem                                          | ≥ 16                                                                         | R                     | Tigecycline                   | ≥ 8        | R                          |
| Meropenem                                         | ≥ 16                                                                         | R                     | Colistin                      |            |                            |
| Amikacin                                          | ≥ 64                                                                         | R                     | Trimethoprim/Sulfamethoxazole |            |                            |
| Gentamicin                                        | ≥ 16                                                                         | R                     |                               |            |                            |
| += Deduced drug *= AES modified **= User modified |                                                                              |                       |                               |            |                            |

**Figure S3.** Identification and antibiotic sensitivity pattern of *Pseudomonas aeruginosa* using Vitek 2 automated system.

|                                                      |                                                                               |                       |                               |            |                           |
|------------------------------------------------------|-------------------------------------------------------------------------------|-----------------------|-------------------------------|------------|---------------------------|
| <b>Identification Information</b>                    | Card: GN                                                                      |                       | Status: Final                 |            |                           |
| <b>Selected Organism</b>                             | 99% Probability <i>Acinetobacter baumannii</i><br>Bionumber: 0201010303500210 |                       |                               |            |                           |
| <b>Susceptibility Information</b>                    | Card: AST-N326                                                                |                       | Status: Final                 |            | Analysis Time: 8.45 hours |
| <b>Antimicrobial</b>                                 | <b>MIC</b>                                                                    | <b>Interpretation</b> | <b>Antimicrobial</b>          | <b>MIC</b> | <b>Interpretation</b>     |
| Piperacillin                                         | ≥ 128                                                                         | R                     | Netilmicin                    | 2          | S                         |
| Piperacillin/Tazobactam                              | ≥ 128                                                                         | R                     | Tobramycin                    | 8          | I                         |
| Ceftazidime                                          | ≥ 64                                                                          | R                     | Ciprofloxacin                 | ≥ 4        | R                         |
| Cefepime                                             |                                                                               |                       | Levofloxacin                  | ≥ 8        | R                         |
| Aztreonam                                            |                                                                               |                       | Tetracycline                  | ≤ 1        | S                         |
| Imipenem                                             | ≥ 16                                                                          | R                     | Tigecycline                   | ≤ 0.5      | S                         |
| Meropenem                                            | ≥ 16                                                                          | R                     | Colistin                      |            |                           |
| Amikacin                                             |                                                                               |                       | Trimethoprim/Sulfamethoxazole | 160        | R                         |
| Gentamicin                                           | ≥ 16                                                                          | R                     |                               |            |                           |
| + = Deduced drug * = AES modified ** = User modified |                                                                               |                       |                               |            |                           |

**Figure S4.** Identification and antibiotic sensitivity pattern of *Acinetobacter baumannii* using Vitek 2 automated system.
